# Supplementary material
Source: HighWire-hosted journal article supplement (http://www.qdcxjkg.com/highwire/filestream/114146/field_highwire_adjunct_files/0/ERJ-01015-2012_Disclosures.pdf)
Supplement: ERJ-01015-2012_Disclosures.pdf [file ERJ-01015-2012_Disclosures.pdf]

**R. Rodriguez-Roisin** chairs the GOLD Executive Committee and is part of its Scientific Committee. He lectured for Boehringer Ingelheim, GlaxoSmithKline, Novartis, and Pfizer; consulted with AstraZeneca, Boehringer Ingelheim, Merck Sharp and Dohme, Novartis, Nycomed, Pearl Therapeutics, Pfizer, and Procter & Gamble; and received grant support from Almirall and Esteve in relation to the general topic of COPD.
